# Supplementary material for: Functional Polymorphisms in BARD1 Association with Neuroblastoma in a regional Han Chinese Population
Source: PubMed Central journal article supplement — J Cancer. 2019 May 21;10(10):2153–60. doi: 10.7150/jca.26719 (PMC6584405; doi:10.7150/jca.26719), 2019-05-21
Supplement: jcav10p2153s1.pdf [file jcav10p2153s1.pdf]

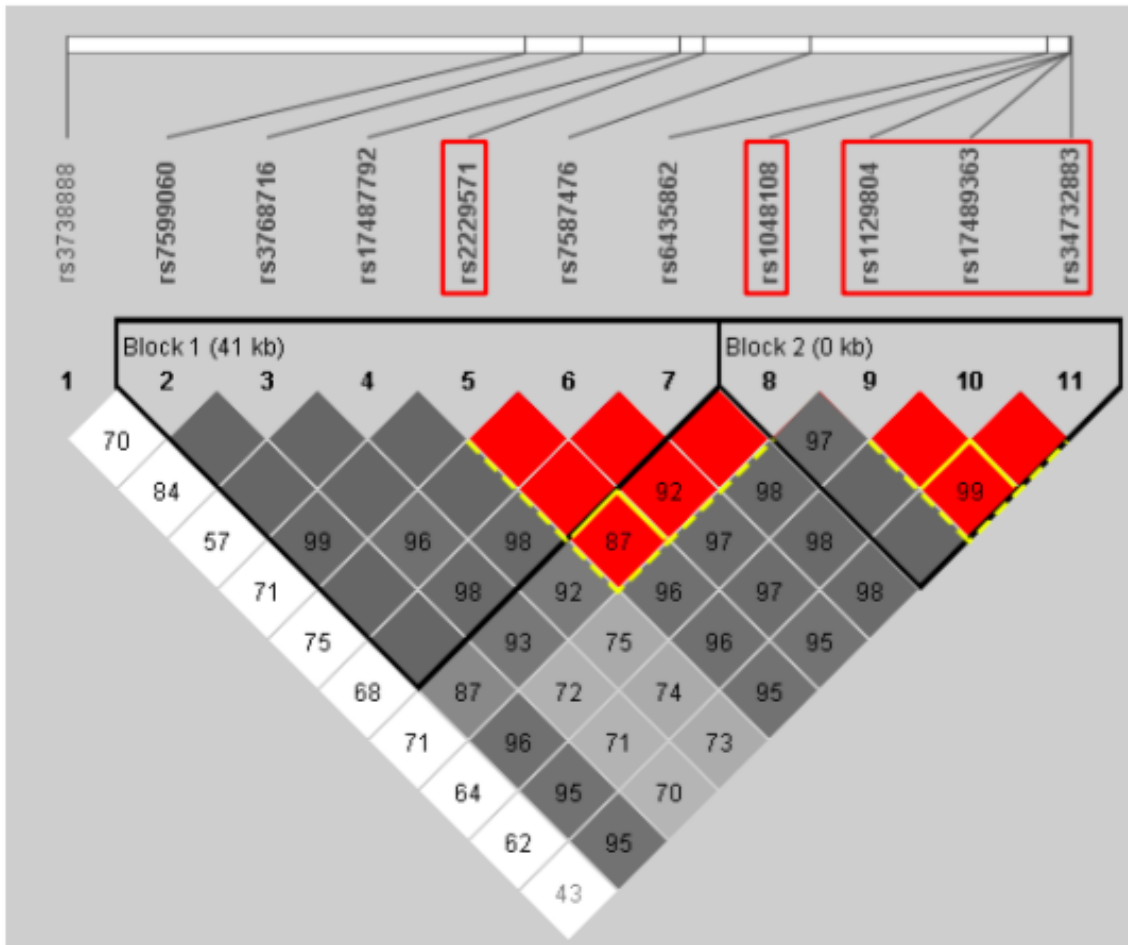

**Supplementary Figure 1.** The LD plot of 11 candidate SNPs in *BARD1* gene. The SNPs located in exon (rs2229871 and rs1048108) and 5'-UTR (rs34732883, rs17489363 and rs1129804) were in deep LD with each other.

**Supplementary Table 1. SNPs Associated with NB Risk Stratified by Clinicopathologic Characteristic and Primary Tumor Site**

|                                        | Categories <sup>b</sup> |                               |                              | Primary Tumor Sites          |                 |                  |                  | Tumor Stage <sup>d</sup> |                              |                 |                              |                 |
|----------------------------------------|-------------------------|-------------------------------|------------------------------|------------------------------|-----------------|------------------|------------------|--------------------------|------------------------------|-----------------|------------------------------|-----------------|
|                                        | GN                      | GNB                           | NB                           | Adrenal                      | Abdominal       | Pelvic           | Others           | I                        | II                           | III             | IV                           | IVs             |
| <b>rs17489363</b>                      |                         |                               |                              |                              |                 |                  |                  |                          |                              |                 |                              |                 |
| <b>Genotypes (Case/Control)</b>        |                         |                               |                              |                              |                 |                  |                  |                          |                              |                 |                              |                 |
| GG                                     | 22/529                  | 32/529                        | 206/529                      | 87/529                       | 90/529          | 15/529           | 14/529           | 32/529                   | 31/529                       | 62/529          | 65/529                       | 14/529          |
| GA                                     | 11/217                  | 21/217                        | 114/217                      | 58/217                       | 40/217          | 4/217            | 12/217           | 11/217                   | 27/217                       | 32/217          | 33/217                       | 10/217          |
| AA                                     | 0/22                    | 6/22                          | 18/22                        | 6/22                         | 7/22            | 1/22             | 4/22             | 2/22                     | 1/22                         | 4/22            | 11/22                        | 0/22            |
| <b>Adjusted OR (95%CI)<sup>a</sup></b> |                         |                               |                              |                              |                 |                  |                  |                          |                              |                 |                              |                 |
| GG                                     | 1.00                    | 1.00                          | 1.00                         | 1.00                         | 1.00            | 1.00             | 1.00             | 1.00                     | 1.00                         | 1.00            | 1.00                         | 1.00            |
| GA                                     | 1.10(0.50-2.44)         | 1.57(0.88-2.79)               | 1.26(0.95-1.68)              | 1.52(1.04-2.21) <sup>c</sup> | 1.02(0.68-1.54) | 0.61(0.20-1.87)  | 1.97(0.86-4.51)  | 0.81(0.40-1.64)          | 1.97(1.13-3.41) <sup>c</sup> | 1.21(0.77-1.92) | 1.16(0.74-1.82)              | 1.70(0.70-4.10) |
| AA                                     | 0.00(0.00-NA)           | 4.27(1.64-11.12) <sup>c</sup> | 2.04(1.06-3.92) <sup>c</sup> | 1.57(0.61-4.05)              | 1.92(0.80-4.62) | 2.26(0.82-18.11) | 8.03(2.32-27.86) | 1.72(0.39-7.63)          | 0.73(0.09-5.65)              | 1.60(0.53-4.78) | 3.80(1.77-8.15) <sup>c</sup> | 0.00(0.00-NA)   |
| ) <sup>c</sup>                         |                         |                               |                              |                              |                 |                  |                  |                          |                              |                 |                              |                 |
| <b>rs34732883</b>                      |                         |                               |                              |                              |                 |                  |                  |                          |                              |                 |                              |                 |
| <b>Genotypes (Case/Control)</b>        |                         |                               |                              |                              |                 |                  |                  |                          |                              |                 |                              |                 |
| TT                                     | 21/504                  | 31/504                        | 197/504                      | 82/504                       | 87/504          | 15/504           | 13/504           | 31/504                   | 28/504                       | 61/504          | 63/504                       | 12/504          |
| TC                                     | 11/212                  | 21/212                        | 109/212                      | 58/212                       | 37/212          | 4/212            | 10/212           | 11/212                   | 26/212                       | 31/212          | 31/212                       | 10/212          |
| CC                                     | 0/22                    | 4/22                          | 16/22                        | 4/22                         | 7/22            | 1/22             | 4/22             | 2/22                     | 1/22                         | 2/22            | 11/22                        | 0/22            |
| <b>Adjusted OR (95%CI)<sup>a</sup></b> |                         |                               |                              |                              |                 |                  |                  |                          |                              |                 |                              |                 |
| TT                                     | 1.00                    | 1.00                          | 1.00                         | 1.00                         | 1.00            | 1.00             | 1.00             | 1.00                     | 1.00                         | 1.00            | 1.00                         | 1.00            |
| TC                                     | 1.11(0.50-2.47)         | 1.58(0.88-2.82)               | 1.24(0.93-1.66)              | 1.58(1.08-2.31) <sup>c</sup> | 0.96(0.63-1.46) | 0.59(0.19-1.81)  | 1.69(0.70-4.05)  | 0.81(0.40-1.65)          | 2.07(1.17-3.65) <sup>c</sup> | 1.16(0.73-1.85) | 1.10(0.69-1.75)              | 2.00(0.80-4.97) |
| CC                                     | 0.00(0.00-NA)           | 3.33(1.07-10.40) <sup>c</sup> | 1.81(0.93-3.56)              | 1.01(0.33-3.05)              | 1.95(0.81-4.70) | 2.29(0.28-18.45) | 8.74(2.51-30.45) | 1.71(0.38-7.62)          | 0.73(0.09-5.68)              | 0.79(0.18-3.46) | 3.86(1.80-8.30) <sup>c</sup> | 0.00(0.00-NA)   |
| ) <sup>c</sup>                         |                         |                               |                              |                              |                 |                  |                  |                          |                              |                 |                              |                 |

---

**rs1129804****Genotypes (Case/Control)**

|    |        |        |         |        |        |        |        |        |        |        |        |        |
|----|--------|--------|---------|--------|--------|--------|--------|--------|--------|--------|--------|--------|
| CC | 11/302 | 26/302 | 93/302  | 57/302 | 57/302 | 7/302  | 14/302 | 14/302 | 24/302 | 42/302 | 41/302 | 12/302 |
| CG | 17/354 | 28/354 | 117/354 | 78/354 | 60/354 | 10/354 | 15/354 | 23/354 | 26/354 | 47/354 | 57/354 | 9/354  |
| GG | 5/103  | 5/103  | 30/103  | 18/103 | 20/103 | 3/103  | 1/103  | 8/103  | 9/103  | 10/103 | 11/103 | 3/103  |

**Adjusted OR (95%CI)<sup>a</sup>**

|    |                 |                 |                 |                 |                 |                 |                 |                 |                 |                 |                 |                 |
|----|-----------------|-----------------|-----------------|-----------------|-----------------|-----------------|-----------------|-----------------|-----------------|-----------------|-----------------|-----------------|
| CC | 1.00            | 1.00            | 1.00            | 1.00            | 1.00            | 1.00            | 1.00            | 1.00            | 1.00            | 1.00            | 1.00            | 1.00            |
| CG | 1.55(0.68-3.54) | 0.95(0.54-1.66) | 1.11(0.80-1.53) | 1.22(0.83-1.79) | 0.92(0.62-1.37) | 1.26(0.47-3.37) | 1.06(0.49-2.31) | 1.43(0.72-2.83) | 0.95(0.53-1.71) | 0.97(0.62-1.52) | 1.24(0.80-1.91) | 0.63(0.25-1.61) |
| GG | 1.08(0.38-3.02) | 0.60(0.23-1.53) | 0.98(0.62-1.55) | 0.89(0.51-1.55) | 1.15(0.68-1.94) | 1.21(0.34-4.25) | 0.28(0.04-2.12) | 1.44(0.65-3.19) | 1.33(0.63-2.85) | 0.76(0.38-1.52) | 0.77(0.40-1.49) | 1.10(0.30-4.06) |

---

**rs2229571****Genotypes (Case/Control)**

|    |        |        |         |        |        |        |        |        |        |        |        |       |
|----|--------|--------|---------|--------|--------|--------|--------|--------|--------|--------|--------|-------|
| GG | 8/232  | 12/232 | 42/232  | 27/232 | 33/232 | 2/232  | 5/232  | 10/232 | 9/232  | 23/232 | 15/232 | 8/232 |
| GC | 15/370 | 27/370 | 121/370 | 79/370 | 59/370 | 10/370 | 16/370 | 24/370 | 27/370 | 46/370 | 58/370 | 8/370 |
| CC | 10/169 | 20/169 | 73/169  | 45/169 | 42/169 | 8/169  | 9/169  | 11/169 | 23/169 | 28/169 | 35/169 | 7/169 |

**Adjusted OR (95%CI)<sup>a</sup>**

|    |                 |                              |                              |                              |                              |                              |                              |                 |                              |                 |                              |                              |
|----|-----------------|------------------------------|------------------------------|------------------------------|------------------------------|------------------------------|------------------------------|-----------------|------------------------------|-----------------|------------------------------|------------------------------|
| GG | 1.00            | 1.00                         | 1.00                         | 1.00                         | 1.00                         | 1.00                         | 1.00                         | 1.00            | 1.00                         | 1.00            | 1.00                         | 1.00                         |
| GC | 0.71(0.27-1.84) | 1.52(0.75-3.07)              | 2.14(1.43-3.20) <sup>c</sup> | 2.13(1.32-3.43) <sup>c</sup> | 1.22(0.77-1.94)              | 3.58(0.77-16.57)             | 3.16(1.02-9.79) <sup>c</sup> | 1.61(0.75-3.44) | 2.24(1.02-4.91) <sup>c</sup> | 1.36(0.80-2.32) | 2.72(1.50-4.95) <sup>c</sup> | 0.81(0.29-2.29)              |
| CC | 0.67(0.29-1.51) | 1.96(1.10-3.49) <sup>c</sup> | 2.00(1.41-2.84) <sup>c</sup> | 1.83(1.22-2.74) <sup>c</sup> | 1.86(1.23-2.82) <sup>c</sup> | 2.98(1.16-7.66) <sup>c</sup> | 2.44(1.03-5.76) <sup>c</sup> | 1.27(0.62-2.59) | 3.30(1.84-5.94) <sup>c</sup> | 1.71(1.05-2.77) | 1.94(1.24-3.04) <sup>c</sup> | 2.75(1.01-7.48) <sup>c</sup> |

---

**rs3738888****Genotypes (Case/Control)**

|    |        |        |         |         |         |        |        |        |        |        |         |        |
|----|--------|--------|---------|---------|---------|--------|--------|--------|--------|--------|---------|--------|
| CC | 31/749 | 57/749 | 229/749 | 143/749 | 131/749 | 20/749 | 18/749 | 42/749 | 56/749 | 97/749 | 105/749 | 21/749 |
| CT | 2/18   | 2/18   | 11/18   | 9/18    | 6/18    | 0/18   | 0/18   | 3/18   | 3/18   | 2/18   | 4/18    | 3/18   |
| TT | 0/0    | 0/0    | 0/0     | 0/0     | 0/0     | 0/0    | 0/0    | 0/0    | 0/0    | 0/0    | 0/0     | 0/0    |

**Adjusted OR (95%CI)<sup>a</sup>**

|    |                  |                 |                 |                              |                 |               |               |                  |                  |                 |                 |                               |
|----|------------------|-----------------|-----------------|------------------------------|-----------------|---------------|---------------|------------------|------------------|-----------------|-----------------|-------------------------------|
| CC | 1.00             | 1.00            | 1.00            | 1.00                         | 1.00            | 1.00          | 1.00          | 1.00             | 1.00             | 1.00            | 1.00            | 1.00                          |
| CT | 2.38(0.46-12.29) | 1.52(0.34-6.80) | 2.19(0.96-5.00) | 2.72(1.15-6.45) <sup>c</sup> | 2.26(0.87-5.92) | 0.00(0.00-NA) | 0.00(0.00-NA) | 3.32(0.92-11.92) | 2.09(0.23-18.98) | 1.03(0.23-4.56) | 1.73(0.57-5.29) | 6.61(1.25-35.09) <sup>c</sup> |

|                                        |                 |                               |                              |                              |                 |                 |                  |                 |                              |                              |                 |                  |
|----------------------------------------|-----------------|-------------------------------|------------------------------|------------------------------|-----------------|-----------------|------------------|-----------------|------------------------------|------------------------------|-----------------|------------------|
| TT                                     | -               | -                             | -                            | -                            | -               | -               | -                | -               | -                            | -                            | -               | -                |
| <b>rs1048108</b>                       |                 |                               |                              |                              |                 |                 |                  |                 |                              |                              |                 |                  |
| <b>Genotypes (Case/Control)</b>        |                 |                               |                              |                              |                 |                 |                  |                 |                              |                              |                 |                  |
| CC                                     | 10/307          | 32/307                        | 100/307                      | 61/307                       | 62/307          | 9/307           | 15/307           | 14/307          | 26/307                       | 45/307                       | 46/307          | 91/307           |
| CT                                     | 19/369          | 23/369                        | 112/369                      | 74/369                       | 59/369          | 8/369           | 13/369           | 23/369          | 28/369                       | 43/369                       | 52/369          | 95/369           |
| TT                                     | 4/95            | 4/95                          | 27/95                        | 16/95                        | 16/95           | 3/95            | 1/95             | 8/95            | 5/95                         | 10/95                        | 11/95           | 21/95            |
| <b>Adjusted OR (95%CI)<sup>a</sup></b> |                 |                               |                              |                              |                 |                 |                  |                 |                              |                              |                 |                  |
| CC                                     | 1.00            | 1.00                          | 1.00                         | 1.00                         | 1.00            | 1.00            | 1.00             | 1.00            | 1.00                         | 1.00                         | 1.00            | 1.00             |
| CT                                     | 1.61(0.74-3.53) | 0.62(0.36-1.09)               | 1.00(0.73-1.38)              | 1.10(0.75-1.61)              | 0.82(0.55-1.21) | 0.80(0.30-2.11) | 0.81(0.37-1.77)  | 1.42(0.72-2.81) | 0.97(0.55-1.71)              | 0.83(0.53-1.29)              | 1.00(0.65-1.53) | 0.93(0.58-1.50)  |
| TT                                     | 1.23(0.37-4.02) | 0.40(0.14-1.15)               | 0.88(0.53-1.46)              | 0.88(0.48-1.63)              | 0.84(0.46-1.53) | 1.07(0.28-4.07) | 0.23(0.03-1.78)  | 1.86(0.75-4.57) | 0.64(0.24-1.75)              | 0.72(0.35-1.48)              | 0.80(0.39-1.61) | 0.85(0.10-1.82)  |
| <b>rs376716</b>                        |                 |                               |                              |                              |                 |                 |                  |                 |                              |                              |                 |                  |
| <b>Genotypes (Case/Control)</b>        |                 |                               |                              |                              |                 |                 |                  |                 |                              |                              |                 |                  |
| AA                                     | 22/555          | 34/555                        | 149/555                      | 87/555                       | 90/555          | 15/555          | 19/555           | 33/555          | 34/555                       | 58/555                       | 66/555          | 17/555           |
| AG                                     | 11/200          | 18/200                        | 81/200                       | 58/200                       | 40/200          | 5/200           | 8/200            | 11/200          | 23/200                       | 36/200                       | 36/200          | 5/200            |
| GG                                     | 0/18            | 7/18                          | 6/18                         | 6/18                         | 4/18            | 0/18            | 3/18             | 1/18            | 2/18                         | 3/18                         | 6/18            | 1/18             |
| <b>Adjusted OR (95%CI)<sup>a</sup></b> |                 |                               |                              |                              |                 |                 |                  |                 |                              |                              |                 |                  |
| AA                                     | 1.00            | 1.00                          | 1.00                         | 1.00                         | 1.00            | 1.00            | 1.00             | 1.00            | 1.00                         | 1.00                         | 1.00            | 1.00             |
| AG                                     | 1.10(0.50-2.42) | 1.42(0.78-2.58)               | 1.61(1.16-2.25) <sup>c</sup> | 1.92(1.31-2.81) <sup>c</sup> | 1.23(0.82-1.85) | 0.91(0.32-2.55) | 1.19(0.50-2.86)  | 0.92(0.45-1.86) | 1.96(1.11-3.46) <sup>c</sup> | 1.74(1.11-2.73) <sup>c</sup> | 1.51(0.97-2.34) | 0.99(0.34-2.89)  |
| GG                                     | 0.00(0.00-NA)   | 5.55(2.02-14.03) <sup>c</sup> | 0.99(0.38-2.57)              | 1.56(0.60-4.07)              | 1.21(0.40-3.65) | 0.00(0.00-NA)   | 4.19(1.09-16.19) | 0.90(0.12-6.91) | 1.43(0.32-6.42)              | 1.27(0.36-4.41)              | 2.19(0.84-5.68) | 2.47(0.27-22.69) |
| <b>rs6435862</b>                       |                 |                               |                              |                              |                 |                 |                  |                 |                              |                              |                 |                  |
| <b>Genotypes (Case/Control)</b>        |                 |                               |                              |                              |                 |                 |                  |                 |                              |                              |                 |                  |
| TT                                     | 26/594          | 38/594                        | 232/594                      | 96/594                       | 99/594          | 17/594          | 20/594           | 36/594          | 37/594                       | 67/594                       | 71/594          | 18/594           |
| TG                                     | 6/168           | 17/168                        | 96/168                       | 51/168                       | 35/168          | 3/168           | 7/168            | 8/168           | 22/168                       | 27/168                       | 33/168          | 6/168            |
| GG                                     | 0/10            | 4/10                          | 9/10                         | 4/10                         | 2/10            | 0/10            | 3/10             | 1/10            | 0/10                         | 3/10                         | 5/10            | 0/10             |
| <b>Adjusted OR (95%CI)<sup>a</sup></b> |                 |                               |                              |                              |                 |                 |                  |                 |                              |                              |                 |                  |

|    |                 |                               |                              |                              |                 |                 |                  |                  |                              |                 |                               |                 |
|----|-----------------|-------------------------------|------------------------------|------------------------------|-----------------|-----------------|------------------|------------------|------------------------------|-----------------|-------------------------------|-----------------|
| TT | 1.00            | 1.00                          | 1.00                         | 1.00                         | 1.00            | 1.00            | 1.00             | 1.00             | 1.00                         | 1.00            | 1.00                          | 1.00            |
| TG | 0.70(0.27-1.84) | 1.54(0.85-2.81)               | 1.40(1.04-1.90) <sup>c</sup> | 1.82(1.23-2.69) <sup>c</sup> | 1.20(0.78-1.84) | 0.59(0.17-2.05) | 1.15(0.46-2.86)  | 0.76(0.35-1.68)  | 2.02(1.15-3.57) <sup>c</sup> | 1.39(0.86-2.25) | 1.56(1.00-2.45) <sup>c</sup>  | 1.21(0.44-3.28) |
| GG | 0.00(0.00-NA)   | 5.60(1.68-18.62) <sup>c</sup> | 2.05(0.81-5.18) <sup>c</sup> | 2.19(0.66-7.26)              | 1.14(0.25-5.28) | 0.00(0.00-NA)   | 9.12(2.11-39.46) | 1.75(0.22-13.99) | 0.00(0.00-NA)                | 2.53(0.68-9.43) | 3.44(1.14-10.34) <sup>c</sup> | 0.00(0.00-NA)   |

)<sup>c</sup>

**rs3768707**

**Genotypes (Case/Control)**

|    |        |        |         |        |        |        |        |        |        |        |        |        |
|----|--------|--------|---------|--------|--------|--------|--------|--------|--------|--------|--------|--------|
| CC | 18/499 | 28/499 | 133/499 | 78/499 | 78/499 | 13/499 | 14/499 | 29/499 | 28/499 | 52/499 | 59/499 | 13/499 |
| CT | 15/242 | 23/242 | 91/242  | 65/242 | 49/242 | 6/242  | 12/242 | 14/242 | 29/242 | 41/242 | 38/242 | 9/242  |
| TT | 0/31   | 8/31   | 12/31   | 8/31   | 7/31   | 1/31   | 4/31   | 2/31   | 2/31   | 4/31   | 11/31  | 1/31   |

**Adjusted OR (95%CI)<sup>a</sup>**

|    |                 |                              |                 |                              |                 |                  |                  |                 |                              |                              |                              |                  |
|----|-----------------|------------------------------|-----------------|------------------------------|-----------------|------------------|------------------|-----------------|------------------------------|------------------------------|------------------------------|------------------|
| CC | 1.00            | 1.00                         | 1.00            | 1.00                         | 1.00            | 1.00             | 1.00             | 1.00            | 1.00                         | 1.00                         | 1.00                         | 1.00             |
| CT | 1.46(0.68-3.09) | 1.66(0.93-2.95)              | 1.40(1.02-1.93) | 1.67(1.15-2.42) <sup>c</sup> | 1.25(0.84-1.85) | 0.91(0.34-2.45)  | 1.72(0.76-3.93)  | 0.97(0.50-1.88) | 2.07(1.19-3.59) <sup>c</sup> | 1.59(1.02-2.47) <sup>c</sup> | 1.28(0.82-1.98)              | 1.54(0.61-3.87)  |
| TT | 0.00(0.00-NA)   | 3.73(1.62-8.57) <sup>c</sup> | 1.32(0.65-2.68) | 1.36(0.60-3.08)              | 1.31(0.56-3.05) | 1.29(0.17-10.00) | 4.36(1.34-14.24) | 1.11(0.26-4.82) | 0.92(0.21-4.00)              | 1.05(0.36-3.07)              | 2.59(1.25-5.36) <sup>c</sup> | 1.64(0.19-14.15) |

)<sup>c</sup>

**rs17487792**

**Genotypes (Case/Control)**

|    |        |        |         |        |        |        |        |        |        |        |        |        |
|----|--------|--------|---------|--------|--------|--------|--------|--------|--------|--------|--------|--------|
| CC | 23/545 | 34/545 | 146/545 | 83/545 | 92/545 | 15/545 | 19/545 | 33/545 | 31/545 | 60/545 | 65/545 | 17/545 |
| CT | 9/192  | 17/192 | 77/192  | 57/192 | 36/192 | 5/192  | 6/192  | 10/192 | 22/192 | 33/192 | 34/192 | 5/192  |
| TT | 0/16   | 4/16   | 6/16    | 4/16   | 3/16   | 0/16   | 3/16   | 1/16   | 1/16   | 1/16   | 6/16   | 1/16   |

**Adjusted OR (95%CI)<sup>a</sup>**

|    |                 |                               |                              |                              |                 |                 |                  |                 |                             |                 |                              |                  |
|----|-----------------|-------------------------------|------------------------------|------------------------------|-----------------|-----------------|------------------|-----------------|-----------------------------|-----------------|------------------------------|------------------|
| CC | 1.00            | 1.00                          | 1.00                         | 1.00                         | 1.00            | 1.00            | 1.00             | 1.00            | 1.00                        | 1.00            | 1.00                         | 1.00             |
| CT | 0.89(0.38-2.05) | 1.39(0.76-2.55)               | 1.60(1.14-2.24) <sup>c</sup> | 2.02(1.38-2.98) <sup>c</sup> | 1.11(0.73-1.70) | 0.91(0.32-2.55) | 0.90(0.34-2.35)  | 0.86(0.41-1.77) | 2.1(1.18-3.78) <sup>c</sup> | 1.57(0.99-2.49) | 1.48(1.08-7.67) <sup>c</sup> | 1.01(0.35-2.95)  |
| TT | 0.00(0.00-NA)   | 3.44(1.10-10.74) <sup>c</sup> | 1.18(0.45-3.11)              | 1.17(0.38-3.64)              | 1.02(0.29-3.58) | 0.00(0.00-NA)   | 4.81(1.23-18.83) | 1.02(0.13-7.89) | 0.87(0.11-6.79)             | 0.47(0.06-3.58) | 2.55(0.97-6.73)              | 3.25(0.33-31.55) |

)<sup>c</sup>

**rs7587476**

**Genotypes (Case/Control)**

|                                        |                 |                              |                 |                 |                 |                 |                              |                 |                 |                 |                 |                 |
|----------------------------------------|-----------------|------------------------------|-----------------|-----------------|-----------------|-----------------|------------------------------|-----------------|-----------------|-----------------|-----------------|-----------------|
| CC                                     | 14/343          | 28/343                       | 133/343         | 74/343          | 77/343          | 13/343          | 15/343                       | 28/343          | 26/343          | 51/343          | 59/343          | 13/343          |
| CT                                     | 15/206          | 21/206                       | 87/206          | 65/206          | 44/206          | 6/206           | 11/206                       | 13/206          | 28/206          | 36/206          | 38/206          | 10/206          |
| TT                                     | 1/27            | 8/27                         | 12/27           | 7/27            | 9/27            | 1/27            | 4/27                         | 2/27            | 4/27            | 4/27            | 10/27           | 1/27            |
| <b>Adjusted OR (95%CI)<sup>a</sup></b> |                 |                              |                 |                 |                 |                 |                              |                 |                 |                 |                 |                 |
| CC                                     | 1.00            | 1.00                         | 1.00            | 1.00            | 1.00            | 1.00            | 1.00                         | 1.00            | 1.00            | 1.00            | 1.00            | 1.00            |
| CT                                     | 1.90(0.85-4.24) | 1.15(0.63-2.09)              | 0.94(0.66-1.34) | 1.24(0.83-1.84) | 0.83(0.54-1.26) | 0.68(0.25-1.85) | 1.00(0.42-2.34)              | 0.69(0.35-1.37) | 1.52(0.85-2.73) | 1.03(0.64-1.66) | 0.92(0.59-1.46) | 0.86(0.34-2.20) |
| TT                                     | 0.65(0.08-5.30) | 2.96(1.26-6.98) <sup>c</sup> | 1.11(0.52-2.35) | 1.08(0.44-2.64) | 1.46(0.65-3.25) | 0.80(0.10-6.38) | 2.15(0.62-7.41) <sup>c</sup> | 0.93(0.21-4.14) | 1.50(0.48-4.72) | 0.92(0.31-2.78) | 1.92(0.88-4.22) | 0.90(0.10-8.06) |

Abbreviation: NA, not available

<sup>a</sup> Data were calculated by logistic regression analysis with adjustment for sex as covariates

<sup>b</sup> According to the INPC

<sup>c</sup> All P<0.05

<sup>d</sup> At diagnosis according to INSS
